# Supplementary material
Source: publisher figshare collection journal article supplement (https://diabetesjournals.figshare.com/articles/dataset/_/23550024)
Supplement: Supplementary file 1 [file 1]

### *Cell-based Phage Panning*

Phage panning was performed as previously described (1) with one exception, the antagonist antibody TB-001-003 was added to the phage in molar excess to bias the population toward high affinity binders.

### *Antibody Reformatting and Purification*

Phage with high clonal populations were reformatted from single chain variable fragments (scFv) to full length IgG and purified by protein A packed pipet tips, as previously described (1).

### *Binding by Flow Cytometry*

Expi293 cells were transiently transfected with the same GFP- and FLAG-tagged GLP-1R used for phage panning using expifectamine 293 transfection kit (ThermoFisher). 72 hours after transfection 25,000 cells were plated into each well of a v-bottom 384 well plate and incubated in PBS + 0.5% BSA for 30 minutes at 4C. Antibodies were incubated in PBS + 0.5% BSA for one hour at 4C. Cells were subsequently washed, fixed in 4% PFA and stained with an anti-human (Jackson Immuno., catalog #109-136-098) or anti-mouse (Jackson Immuno., catalog #115-606-071) secondary antibody conjugated to APC or alexa-647 for 30 minutes at room temperature. Binding was captured using an iQue3 flow cytometer (Satorius) with appropriate laser filter settings.

### *cAMP Assay*

HEK 293T cells were transfected using calcium phosphate as previously described (2). GLP-1R and GloSensor (Promega, catalog # E2301) was co-expressed and plated onto white 384 well

plates (Corning, catalog # 354660) 24 hours after transfection. 24 hours after plating, cells were incubated in luciferin for two hours at room temperature. Antibodies and drugs were added at a 10X concentration, and a kinetic read was captured on an M5 plate reader (Molecular Devices).

### *β-arrestin 2 Recruitment*

A split luciferase system was developed to assess β-arrestin 2 recruitment. GLP-1R was fused to the SmBit (Promega) on the C-terminus after a short GS linker and β-arrestin 2 was fused to LgBit (Promega) on the N-terminus with a short GS linker. HEK293T cells were transiently transfected with GLP-1R-SmBit and β-arrestin 2-LgBit at a ratio of 1:2 DNA. 24 hours after transfection, cells were plated onto white 384 well plates (Corning, catalog # 354660) and 24 hours after plating, the assay was performed using the Nano-Glo furimazine mixture (Promega, catalog #N1120). Antibodies and drugs were added at a 10X concentration, and a kinetic read was captured on an M5 plate reader (Molecular Devices).

1. Liu Q, *et al.* (2021) Functional GLP-1R antibodies identified from a synthetic GPCR-focused library demonstrate potent blood glucose control. *MAbs* 13(1):1893425.
2. Peterson SM, *et al.* (2015) Elucidation of G-protein and β-arrestin functional selectivity at the dopamine D2 receptor. *Proceedings of the National Academy of Sciences* 112(22):7097-7102.
