# Supplementary material
Source: publisher figshare collection journal article supplement (https://diabetesjournals.figshare.com/articles/dataset/_/23550024)
Supplement: Supplementary file 2 [file 1]

|                | logEC <sub>50</sub> (M) | E <sub>MAX</sub> |
|----------------|-------------------------|------------------|
| <b>binding</b> |                         |                  |
| MAB2814        | -9.3 +/- 0.1            | 85.6 +/- 1.7     |
| TB-001-003     | -9.3 +/- 0.3            | 252.8 +/- 3.7*   |
| TB-222-023     | -9.4 +/- 0.3            | 248.1 +/- 9.2*   |
| TB-222-040     | -9.0 +/- 0.2            | 119.4 +/- 4.4*   |
| TB-222-089     | -8.9 +/- 0.2            | 155.2 +/- 7*     |

\*significant interaction by one-way ANOVA and p<0.05 compared to MAB2814

#### **G protein agonism**

|                   |               |               |
|-------------------|---------------|---------------|
| exendin-4 (1-39)  | -8 +/- 0.3    | 100.9 +/- 3.1 |
| exendin-(9-39)    | -7.7 +/- 0.3  | 1.8 +/- 0.1*  |
| GLP1 (7-37)       | -8.8 +/- 0.1  | 99.4 +/- 2.3  |
| Liraglutide       | -8.0 +/- 0.1  | 99.3 +/- 0.6  |
| GLP1 (1-37)       | -5.9 +/- 0.1* | 93.5 +/- 2*   |
| GLP1 (7-36) Amide | -8.0 +/- 0.1  | 80.8 +/- 0.4* |
| Glucagon          | -6.7 +/- 0.1* | 100.3 +/- 0.7 |
| TB-001-003        | N/A           | N/A           |
| TB-222-023        | N/A           | N/A           |
| TB-222-040        | -9.3 +/- 1*   | 0.7 +/- 0*    |
| TB-222-089        | N/A           | 0.5 +/- 0*    |

\*significant interaction by one-way ANOVA and p<0.05 compared to exendin-4

#### **β-arrestin 2 agonism**

|                  |              |               |
|------------------|--------------|---------------|
| exendin-4 (1-39) | -6.7 +/- 0.2 | 117.8 +/- 4.5 |
| exendin-(9-39)   | N/A          | N/A           |
| TB-001-003       | N/A          | N/A           |
| TB-222-023       | N/A          | N/A           |
| TB-222-040       | N/A          | N/A           |
| TB-222-089       | N/A          | N/A           |

#### **β-arrestin 2 antagonism**

|                |               |                |
|----------------|---------------|----------------|
| exendin-(9-39) | -6.3 +/- 0.1  | -35.7 +/- 1.4  |
| TB-001-003     | -6.1 +/- 0.1* | -39.3 +/- 1.2* |
| TB-222-023     | -6.7 +/- 0.1* | -33.4 +/- 1.1  |
| TB-222-040     | N/A           | N/A            |
| TB-222-089     | N/A           | N/A            |

\*significant interaction by one-way ANOVA and p<0.05 compared to exendin-(9-39)

#### **G protein antagonism (exendin-4)**

|                |               |                 |
|----------------|---------------|-----------------|
| exendin-(9-39) | -6.4 +/- 0.1  | -97.8 +/- 2.5   |
| TB-001-003     | -6.7 +/- 0.1* | -103.8 +/- 1.8* |

|            |               |                |
|------------|---------------|----------------|
| TB-222-023 | -7.0 +/- 0.1* | -100.7 +/- 1.9 |
| TB-222-040 | N/A           | N/A            |
| TB-222-089 | N/A           | N/A            |

\*significant interaction by one-way ANOVA and  $p < 0.05$  compared to exendin-(9-39)

#### G protein antagonism (GLP-1, 7-37)

|                |               |               |
|----------------|---------------|---------------|
| exendin-(9-39) | -6.8 +/- 0.2  | -87.9 +/- 1   |
| TB-001-003     | -7.6 +/- 0.2* | -93.6 +/- 4.6 |
| TB-222-023     | -7.8 +/- 0.2* | -88 +/- 3.3   |

\*significant interaction by one-way ANOVA and  $p < 0.05$  compared to exendin-(9-39)

#### G protein antagonism (liraglutide)

|                |               |               |
|----------------|---------------|---------------|
| exendin-(9-39) | -6.3 +/- 0.3  | -80 +/- 2.9   |
| TB-001-003     | -7.4 +/- 0.3* | -69.3 +/- 6.2 |
| TB-222-023     | -7.4 +/- 0.3* | -75.6 +/- 7.7 |

\*significant interaction by one-way ANOVA and  $p < 0.05$  compared to exendin-(9-39)

#### G protein antagonism (GLP-1, 1-37)

|                |               |               |
|----------------|---------------|---------------|
| exendin-(9-39) | -6.6 +/- 0.1  | -90.2 +/- 1.1 |
| TB-001-003     | -7.7 +/- 0.2* | -82.8 +/- 3.2 |
| TB-222-023     | -7.8 +/- 0.3* | -87.7 +/- 7.3 |

\*significant interaction by one-way ANOVA and  $p < 0.05$  compared to exendin-(9-39)

#### G protein antagonism (GLP-1, 7-36, amide)

|                |               |                |
|----------------|---------------|----------------|
| exendin-(9-39) | -6.0 +/- 0.2  | -81.9 +/- 3.5  |
| TB-001-003     | -6.9 +/- 0.4* | -69.6 +/- 12.4 |
| TB-222-023     | -7.5 +/- 0.4* | -70 +/- 10.1   |

\*significant interaction by one-way ANOVA and  $p < 0.05$  compared to exendin-(9-39)

#### G protein antagonism (glucagon)

|                |               |                 |
|----------------|---------------|-----------------|
| exendin-(9-39) | -5.1 +/- 0.1  | -92.9 +/- 2.7   |
| TB-001-003     | -6.4 +/- 0.1* | -93 +/- 3.9     |
| TB-222-023     | -6.4 +/- 0.1* | -107.4 +/- 7.4* |

\*significant interaction by one-way ANOVA and  $p < 0.05$  compared to exendin-(9-39)

**Table S1.** Efficacy ( $E_{MAX}$ ) and potency ( $\log EC_{50}$ ) for each molecule in every assay presented. Values are presented as calculated from fitting to curve  $Y = \text{Bottom} + (\text{Top} - \text{Bottom}) / (1 + 10^{-(\log EC_{50} - X)})$  in Graphpad Prism. Where  $EMAX = \text{Top} - \text{Bottom}$ . Error is the standard deviation, as calculated from 95% confidence intervals from curve fits. N/A reported when curves were not able to be accurately fit to the data. For each group, a one-way ANOVA was performed on values and standard deviations for  $EC_{50}$  and  $EMAX$  separately, with a Tukey's posthoc comparison to indicated controls.
